# Supplementary material for: Facile Synthesis of Hollow Carbon Nanospheres by Using Microwave Radiation
Source: Hindawi journal article supplement (doi:10.1155/2020/9031535), 2020-03-11
Supplement: f1 [file 9031535.f1.pdf]

## Supporting Information for “Facile synthesis of hollow carbon nanospheres by using microwave radiation”

Jiareng Chen<sup>1</sup>, Jiaqi Lin<sup>1</sup>, Bin Cui<sup>1</sup>, Yang Liu<sup>1\*</sup>

<sup>1</sup>Department of Biomedical Engineering, Sun Yat-sen University, Guangzhou, China 510006

We can get the morphology of the SiO<sub>2</sub> NPs from SEM images (Figure S1) and Software ImageJ was used to obtain the particle size of silicon spheres (only the nearly circular particles in the figure were taken for statistics, and the particle size of irregular products was not counted). The average particle size and its standard deviation of each group with different parameters were calculated (Table S1). It can be seen that the average particle size increase with the decrease of ethanol/H<sub>2</sub>O molar ratio, that is, the increase of water content of the system. With the decrease of ethanol/TEOS molar ratio, the content of TEOS increase, and the average size also increase. In the experiment whose particle size is controlled by the ratio of alcohol to water, except for irregular particles in the EH0 group without adding water (Figure S1a), the product morphology in other groups is more in line with circular particles. The reaction system without pure water added still contain water from ethanol and ammonia, that is to say, the reaction environment of EH0 group is not completely anhydrous. However, compared with other groups, it can be seen that the addition of pure water can make the particle shape closer to the circle, and the particle grows more evenly in all directions. At the same time, irregular particles were also observed in the ET5 group (Figure S11). By comparison, it is found that the molar ratio of TEOS/H<sub>2</sub>O in the EH0 group and the ET5 group is higher, indicating that the TEOS/H<sub>2</sub>O molar ratio might determine whether the morphology of the products is even or not.

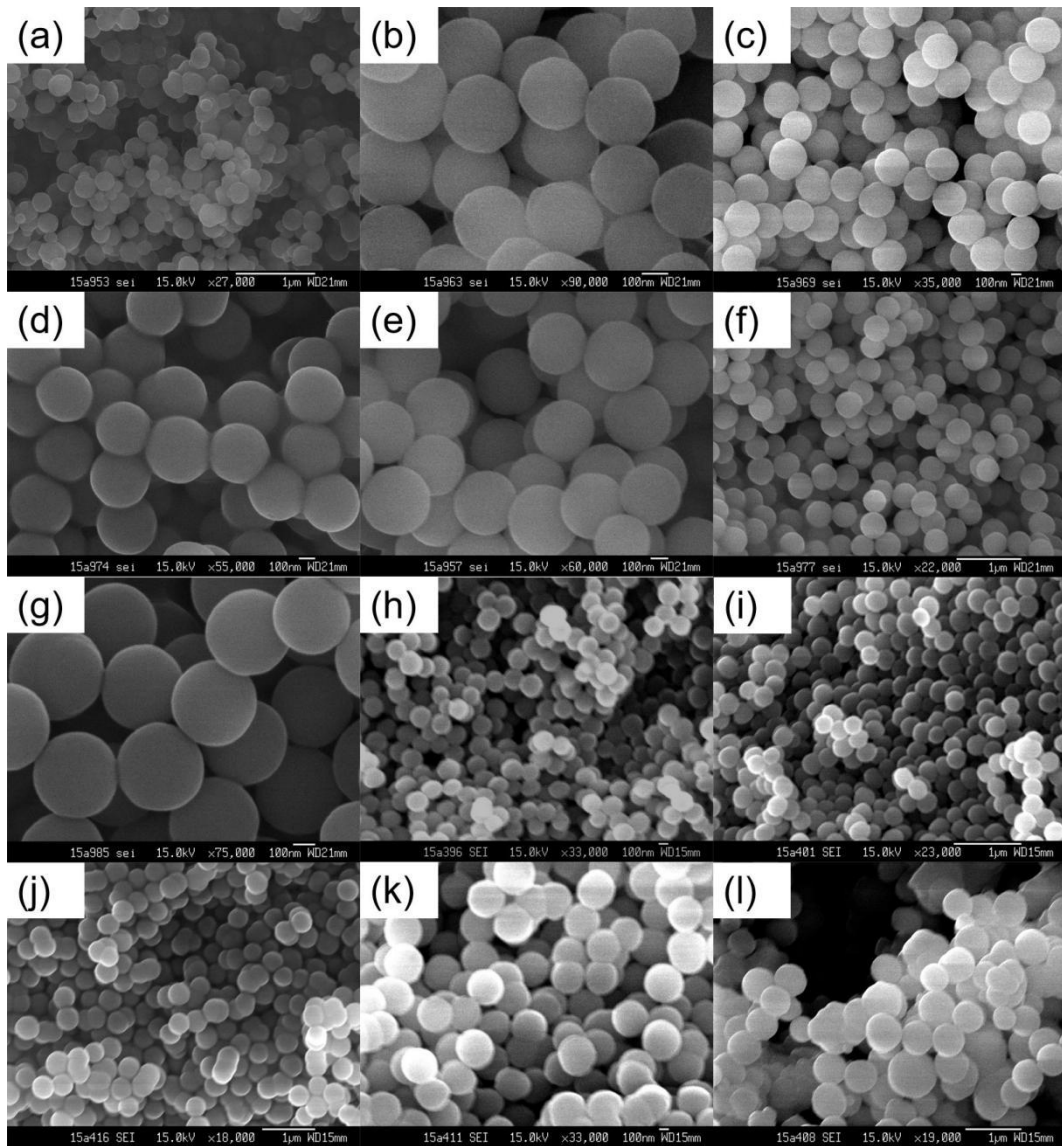

FIGURE S1: SEM images of EH0(a), EH1(b), EH2(c), EH3(d), EH4(e), EH5(f) and EH6(g) in the experiment controlled by alcohol/H<sub>2</sub>O ratio and ET1(h), ET2(i), ET3(j), ET4(k) and ET5(l) in the experiment controlled by alcohol/TEOS ratio

TABLE S1: Mean particle size and standard deviation of silica spheres.

| Samples                                                                     | ethanol/H <sub>2</sub> O<br>molar ratio | Mean particle<br>size/nm | standard<br>deviation/nm |    |
|-----------------------------------------------------------------------------|-----------------------------------------|--------------------------|--------------------------|----|
|                                                                             | EH0                                     | 4.5                      | 228                      | 42 |
|                                                                             | EH1                                     | 3.49                     | 289                      | 20 |
| ethanol/H <sub>2</sub> O<br>controlled particle<br>size group (EH<br>group) | EH2                                     | 2.59                     | 331                      | 17 |
|                                                                             | EH3                                     | 2.09                     | 361                      | 22 |
|                                                                             | EH4                                     | 1.82                     | 355                      | 23 |
|                                                                             | EH5                                     | 1.63                     | 375                      | 25 |
|                                                                             | EH6                                     | 1.41                     | 394                      | 32 |
| Samples                                                                     | ethanol/TEOS<br>molar ratio             | Mean particle<br>size/nm | standard<br>deviation/nm |    |
|                                                                             | ET1                                     | 190.93                   | 194                      | 17 |
| ethanol/TEOS<br>controlled particle<br>size group (ET<br>group)             | ET2                                     | 76.37                    | 270                      | 21 |
|                                                                             | ET3                                     | 38.19                    | 374                      | 31 |
|                                                                             | ET4                                     | 31.82                    | 353                      | 49 |
|                                                                             | ET5                                     | 25.46                    | 554                      | 70 |

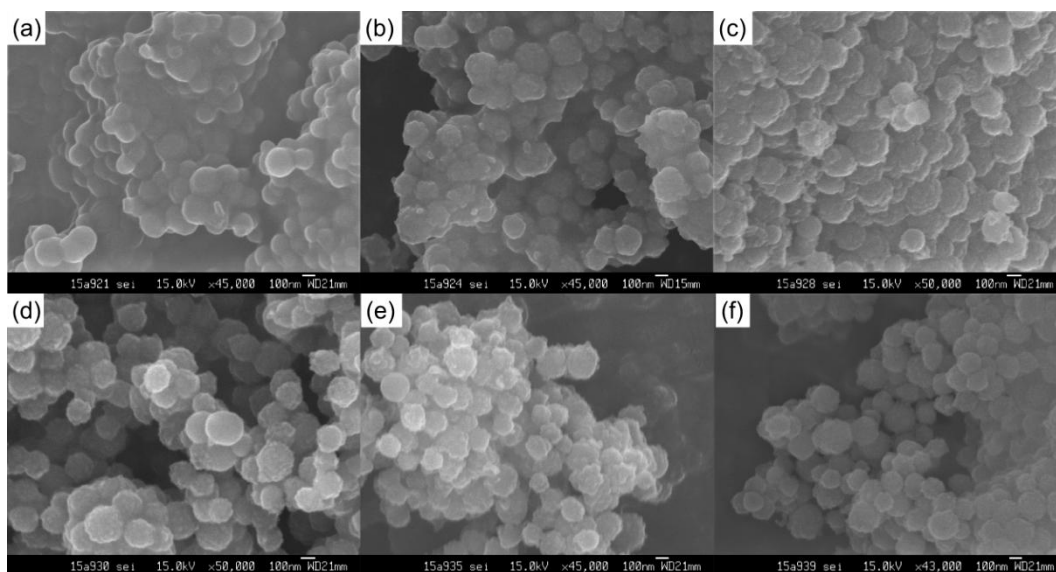

FIGURE S2: SEM images of SiO<sub>2</sub>@PPy NPs at (a)0 wt%, (b)0.1 wt%, (c)0.2 wt%, (d)0.3 wt%, (e)0.4 wt% and (f)0.5 wt% concentration of CSA.

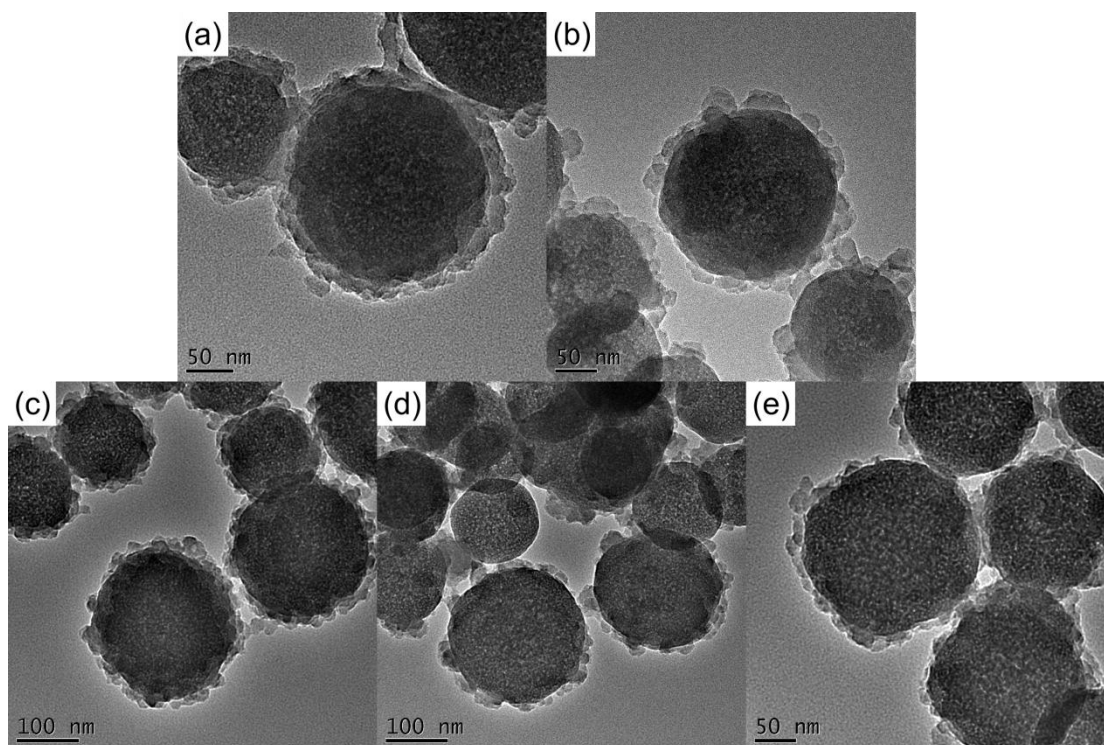

FIGURE S3: TEM images of SiO<sub>2</sub>@PPy NPs at (a)0.1 wt%, (b)0.2 wt%, (c)0.3 wt%, (d)0.4 wt% and (e)0.5 wt% concentration of CSA.

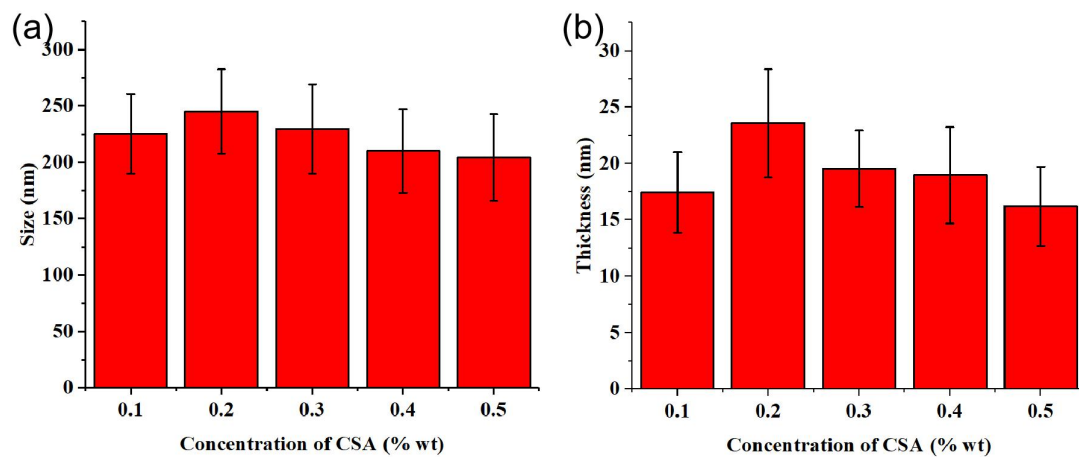

FIGURE S4: (a) Sizes and (b) thicknesses distributions of SiO<sub>2</sub>@PPy NPs produced in different concentrations of CSA.

### Description of the supporting information

The supporting information file contains the experimental details and results, including the scanning electron microscopy (SEM) images, tables containing the experimental parameters, and transmission electron microscopy (TEM) images, to support the discussions in the manuscript.
